# Supplementary material
Source: HighWire-hosted journal article supplement (http://dmd.aspetjournals.org/highwire/filestream/69822/field_highwire_adjunct_files/0/Supplemental_76414.pdf)
Supplement: Supplemental_76414.pdf [file Supplemental_76414.pdf]

**Title:** Measurement and Mathematical Characterization of Cell-level Pharmacokinetics for Antibody-Drug Conjugates: A Case Study with Trastuzumab-vc-MMAE (Supplementary Data)

**Authors:** Aman P. Singh and Dhaval K. Shah

**Journal:** Drug Metabolism and Disposition

**Supplementary Tables:**

**Supplementary Table 1:** A list of back-calculated Quality control (QC) samples for ELISA assay developed to quantify total trastuzumab in media and cell lysate matrix.

| ELISA Type         |                    | QC_2.5<br>ng/mL | QC_25<br>ng/mL | QC_250<br>ng/mL |
|--------------------|--------------------|-----------------|----------------|-----------------|
| <b>Media</b>       | Predicted (ng/mL)  | 5.9             | 23.75          | 235.8           |
|                    | Standard Deviation | 0.437           | 1.17           | 6.78            |
|                    | CV%                | <b>7.4</b>      | <b>4.9</b>     | <b>2.8</b>      |
| <b>Cell Lysate</b> | Predicted (ng/mL)  | 3.29            | 23.94          | 363.126         |
|                    | Standard Deviation | 0.469           | 1.25           | 70.34           |
|                    | CV%                | <b>14.2</b>     | <b>5.4</b>     | <b>19.31</b>    |

**Supplementary Table 2:** A list of back-calculated Quality control (QC) samples for LC-MS/MS assay developed to quantify MMAE in media and cell lysate matrix.

| LC-MS/MS Sample Type |                    | QC_1.25<br>ng/mL | QC_25<br>ng/mL | QC_90<br>ng/mL |
|----------------------|--------------------|------------------|----------------|----------------|
| <b>Media</b>         | Predicted (ng/mL)  | 1.38             | 25.99          | 91.50          |
|                      | Standard Deviation | 0.13             | 0.99           | 1.50           |
|                      | CV%                | <b>10.40</b>     | <b>3.96</b>    | <b>1.67</b>    |
| <b>Cell Lysate</b>   | Predicted (ng/mL)  | 1.41             | 27.60          | 95.10          |
|                      | Standard Deviation | 0.16             | 2.60           | 5.10           |
|                      | CV%                | <b>12.80</b>     | <b>10.40</b>   | <b>5.67</b>    |

# DMD # 76414

**Supplementary Table 3:** Sensitivity Indices obtained after Global Sensitivity Analysis (GSA) performed using a) **SOBOL** and b) **PRCC** method.

## A) Sobol Method

| Global Sensitivities    | V_Cell | MV   | Kin_MMAE | Kout_MMAE   | Tubulin | Kon_Tub | Koff_Tub | Kon_ADC | Koff_ADC | Kint_ADC    | Kdeg_ADC    | AgEx        | DT_Cell |
|-------------------------|--------|------|----------|-------------|---------|---------|----------|---------|----------|-------------|-------------|-------------|---------|
| Media Unconjugated MMAE | 0.10   | 0.15 | 0.00     | <b>0.19</b> | 0.00    | 0.01    | 0.00     | 0.14    | 0.00     | <b>0.14</b> | <b>0.31</b> | <b>1.63</b> | 0.00    |
| Cell Unconjugated MMAE  | 0.59   | 0.17 | 0.00     | <b>0.02</b> | 0.00    | 0.00    | 0.00     | 0.05    | 0.00     | <b>0.11</b> | <b>0.21</b> | <b>1.67</b> | 0.04    |
| Media Total MMAE        | 0.08   | 0.43 | 0.04     | <b>0.04</b> | 0.00    | 0.00    | 0.00     | 0.04    | 0.00     | <b>0.09</b> | <b>0.01</b> | <b>0.29</b> | 0.40    |
| Cell Total MMAE         | 0.56   | 0.17 | 0.00     | <b>0.01</b> | 0.00    | 0.00    | 0.00     | 0.04    | 0.00     | <b>0.02</b> | <b>0.01</b> | <b>2.04</b> | 0.05    |
| Media Total Antibody    | 0.00   | 0.30 | 0.00     | <b>0.00</b> | 0.00    | 0.00    | 0.00     | 0.04    | 0.00     | <b>0.17</b> | <b>0.00</b> | <b>0.39</b> | 0.22    |
| Cell Total Antibody     | 2.19   | 0.12 | 0.00     | <b>0.00</b> | 0.00    | 0.00    | 0.00     | 0.03    | 0.00     | <b>0.48</b> | <b>3.89</b> | <b>1.67</b> | 0.03    |

## B) PRCC Method

| Global Sensitivities    | V_Cell | MV    | Kin_MMAE | Kout_MMAE    | Tubulin | Kon_Tub | Koff_Tub | Kon_ADC | Koff_ADC | Kint_ADC    | Kdeg_ADC     | AgEx        | DT_Cell |
|-------------------------|--------|-------|----------|--------------|---------|---------|----------|---------|----------|-------------|--------------|-------------|---------|
| Media Unconjugated MMAE | 0.08   | -0.20 | 0.00     | <b>0.16</b>  | 0.01    | 0.01    | -0.02    | 0.13    | 0.06     | <b>0.15</b> | <b>0.19</b>  | <b>0.16</b> | -0.05   |
| Cell Unconjugated MMAE  | -0.20  | 0.01  | 0.03     | <b>-0.02</b> | 0.03    | 0.03    | 0.00     | 0.10    | 0.02     | <b>0.18</b> | <b>0.16</b>  | <b>0.18</b> | -0.02   |
| Media Total MMAE        | 0.03   | -0.40 | 0.05     | <b>-0.11</b> | 0.01    | -0.02   | -0.01    | 0.11    | -0.03    | <b>0.17</b> | <b>-0.07</b> | <b>0.40</b> | -0.39   |
| Cell Total MMAE         | -0.31  | 0.04  | 0.05     | <b>-0.06</b> | 0.10    | -0.01   | 0.03     | 0.06    | 0.00     | <b>0.05</b> | <b>0.02</b>  | <b>0.28</b> | -0.03   |
| Media Total Antibody    | -0.02  | -0.42 | 0.01     | <b>-0.04</b> | 0.00    | -0.02   | -0.01    | 0.13    | -0.02    | <b>0.22</b> | <b>-0.05</b> | <b>0.46</b> | -0.30   |
| Cell Total Antibody     | -0.22  | 0.00  | 0.03     | <b>0.05</b>  | 0.07    | -0.01   | -0.01    | 0.07    | -0.06    | <b>0.22</b> | <b>-0.10</b> | <b>0.18</b> | 0.02    |

Supplementary Figures

Supplementary Figure S1. ELISA standard curves generated for quantification of total trastuzumab in (A) media and (B) cell lysate samples.

# Supplementary Figure 1

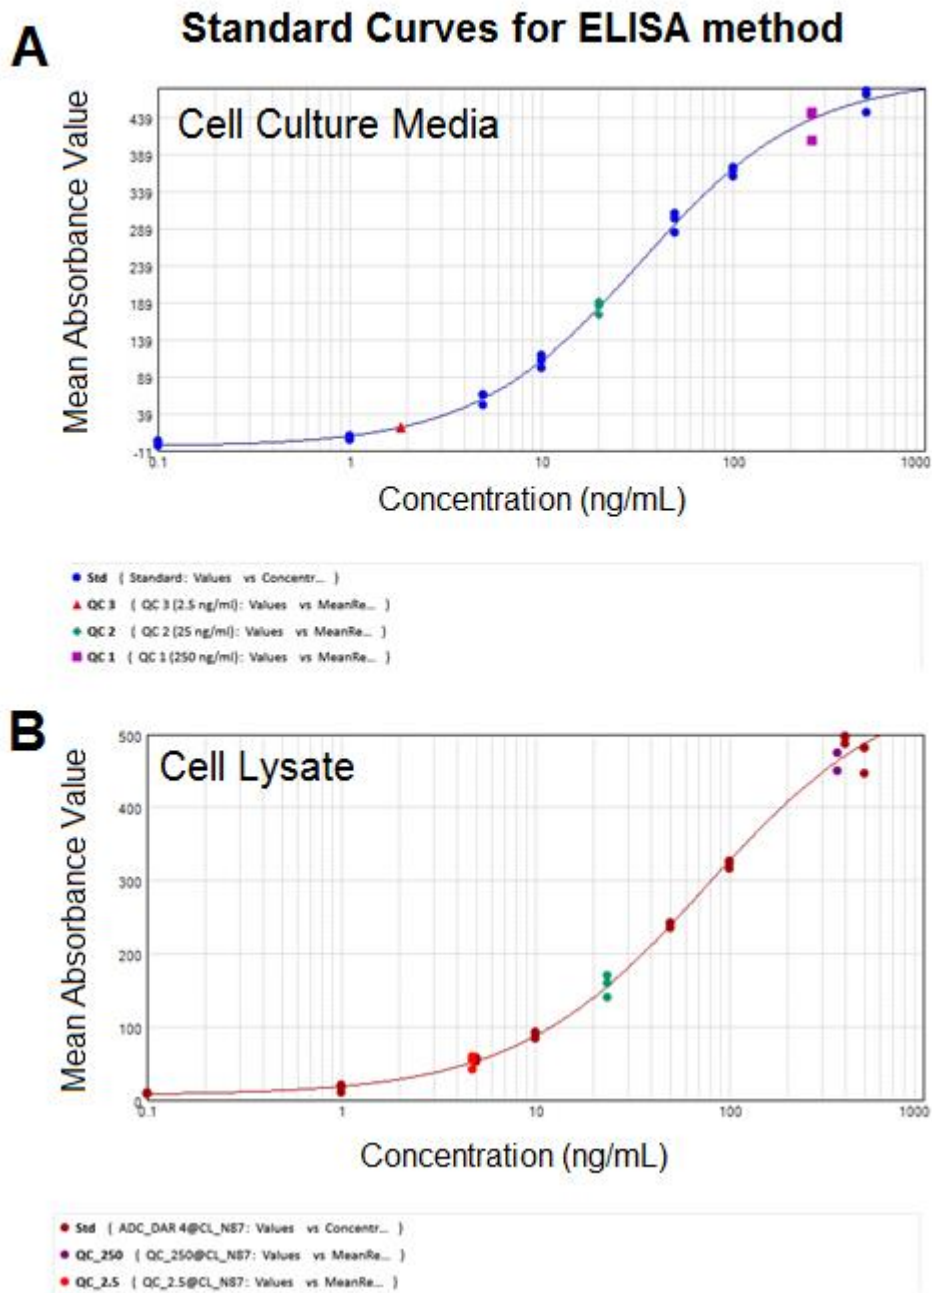

Supplementary Figure S2. LC-MS/MS standard curves generated for quantification of unconjugated MMAE in (A) cell lysate and (B) media.

## Supplementary Figure 2

### Standard Curves for LC-MS/MS Method for MMAE Quantification

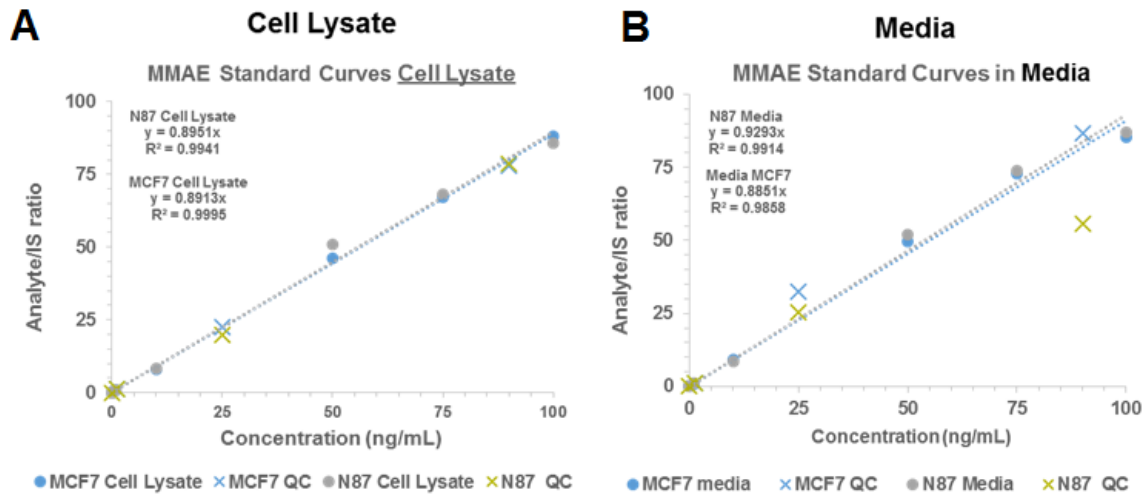

Supplementary Figure S3. Model generated and observed media and intracellular PK profiles of different ADC analytes after continuous exposure (panels A and C) and 2h exposure (panels B and D) of 75 nM T-

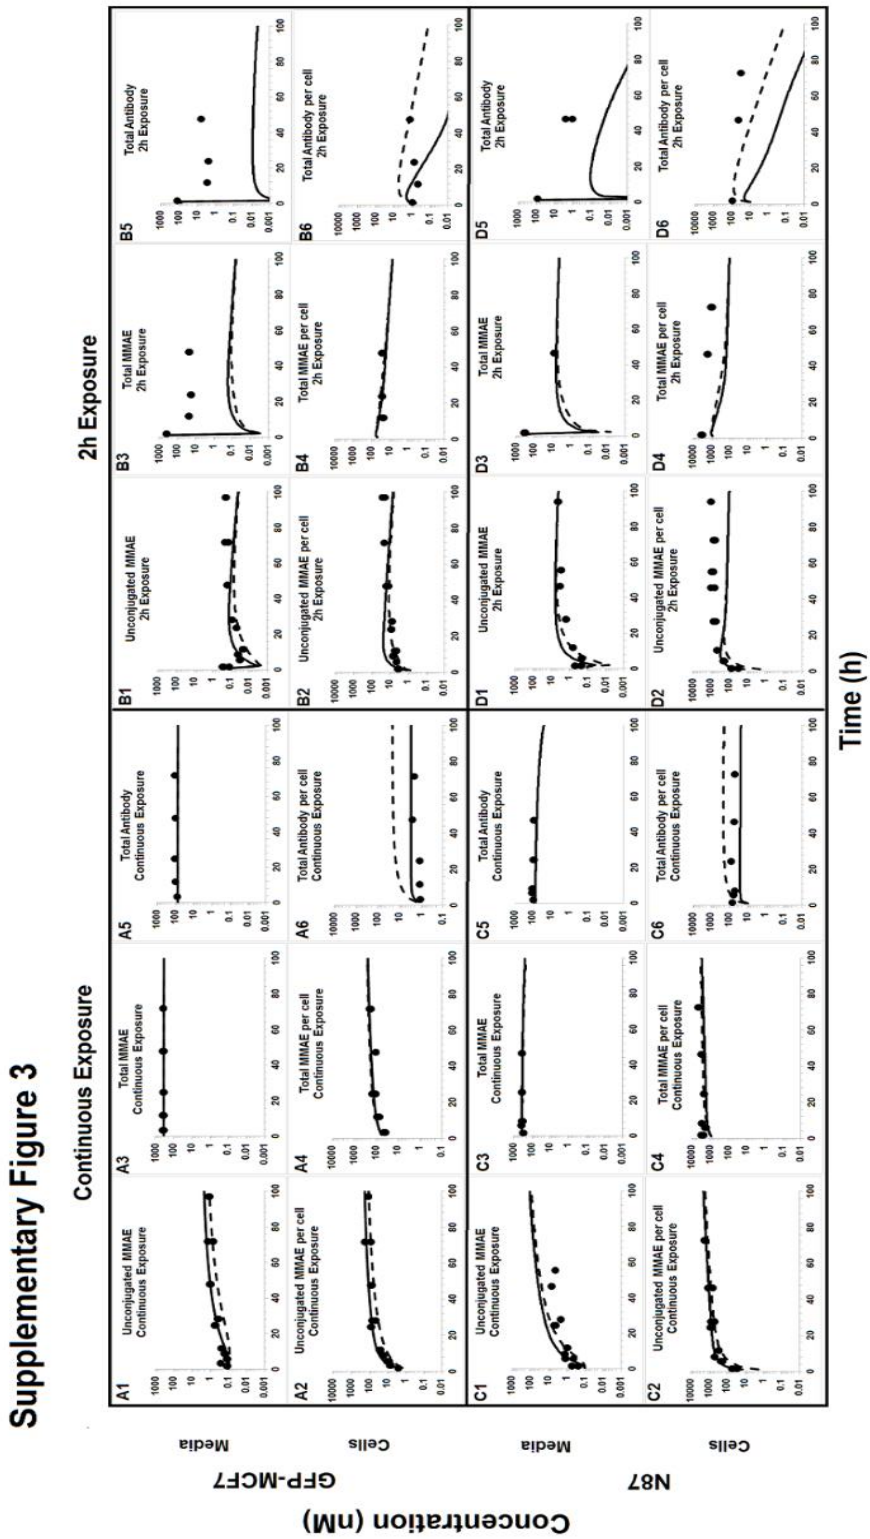

## **DMD # 76414**

vc-MMAE in GFP-MCF7 cells (panels A and B) and N87 cells (panels C and D). Here 3% carryover of ADC after 2h washing was not incorporated. Solid circles represent observed data, solid lines represent model fitted profiles, and dashed lines represent model simulated profiles generated using a slower kdeg value obtained from (Maass et al., 2016).
